# Supplementary material for: Heme Oxygenase-1-Modified Bone Marrow Mesenchymal Stem Cells Combined with Normothermic Machine Perfusion Repairs Bile Duct Injury in a Rat Model of DCD Liver Transplantation via Activation of Peribiliary Glands through the Wnt Pathway
Source: Stem Cells Int. 2021 Jul 1;2021:9935370. doi: 10.1155/2021/9935370 (PMC8275434; doi:10.1155/2021/9935370)
Supplement: Supplementary Materials — Table S1: primers for qRT-PCR. Figure S1: diagram of NMP. Figure S2: morphology and characteristics of HO-1/BMMSCs. (A) HO-1/BMMSCs were adherent cells with long spindle shape. (B) HO-1/BMMSCs could differentiate into osteoblasts in vitro. (C) HO-1/BMMSCs could differentiate into adipocytes in vitro. (D–F) HO-1/BMSCs were positive for CD29, CD90, and RT1-A and negative for CD34, CD45 and RT1-B using flow cytometry. (G, H) Western blotting and PCR confirmed HO-1 overexpression in HO-1/BMMSCs. (I) HO-1/BMMSCs transfected with adenovirus vectors expressing GFP in the fluorescence field. Figure S3: schematic diagram of mechanism underlying HO-1/BMMSCs modulating PBG cells to repair injury. [file 9935370.f1.pdf]

## Supplementary Table

**Table. 1 Primers for qRT-PCR**

| Gene             | Primer sequence                  |
|------------------|----------------------------------|
| $\beta$ -catenin | F 5'-TACCGCTGGGACCCTACACAAC-3'   |
| $\beta$ -catenin | R 5'-GCGTGGTGATGGCGTAGAACAG-3'   |
| Wnt3             | F 5'-CAGCCTGACTTCCGAGCCATTG-3'   |
| Wnt3             | R 5'-ACTCCCGATGCTTCTCCACCAC-3'   |
| CFTR             | F 5'-AGTGTCTTCCAGCGAGCCCTTAG-3'  |
| CFTR             | R 5'-TCCTCCGTCTCCTCTTTCACAGC-3'  |
| SOX9             | F 5'-TGGCAGAGGGTGGCAGACAG-3'     |
| SOX9             | R 5'-CGTTGGGCGGCAGGTATTGG-3'     |
| Nanog            | F 5'-CTGCCTCTCCTCCGCCTTCC-3'     |
| Nanog            | R 5'-CTCGTCAGCCTCGGGACCAG-3'     |
| VEGF             | F 5'-CACGACAGAAGGGGAGCAGAAAG-3'  |
| VEGF             | R 5'-GGCACACAGGACGGCTTGAAG-3'    |
| ZO-1             | F 5'-CGCAGCCAGTTCAAACAAAGTTCC-3' |
| ZO-1             | R 5'-GCAACATCAGCAATCGGTCCAAAG-3' |
| Occludin         | F 5'-CAACGGCAAAGTGAATGGCAAGAG-3' |
| Occludin         | R 5'-TCATCCACGGACAAGGTCAGAGG-3'  |
| HO-1             | F 5'-CAGACAGAGTTTCTTCGCCAGAGG-3' |
| HO-1             | R 5'-TGTGAGGACCCATCGCAGGAG-3'    |
| $\beta$ -actin   | F 5'-CGCGAGTACAACCTTCTTGC-3'     |
| $\beta$ -actin   | R 5'-ATACCCACCATCACACCCTG-3'     |

## Supplementary Figures

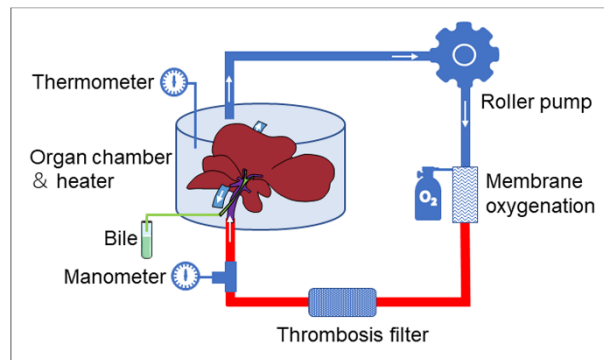

**Supplementary Fig. 1** Diagram of NMP. The perfusion machine consists of an organ chamber, a rolling pump, a membrane oxygenator, a thrombus filter, a temperature sensor, and a pressure sensor. NMP; normothermic machine perfusion.

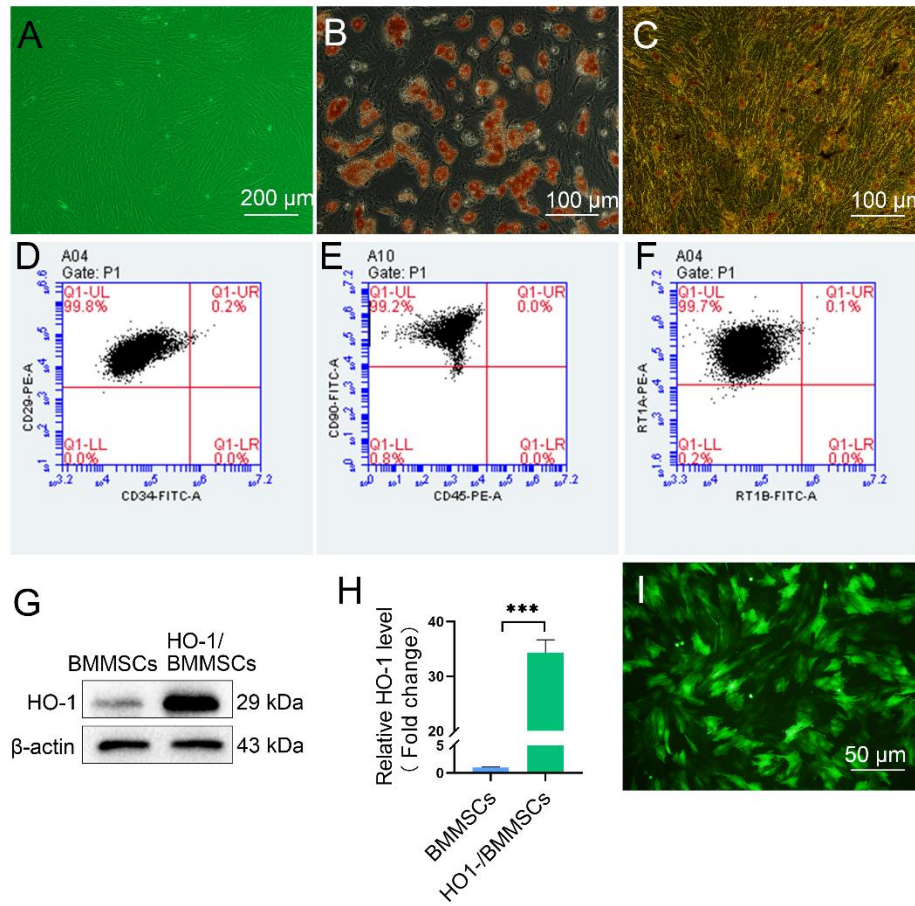

**Supplementary Fig. 2** Morphology and characteristics of HO-1/BMMSCs. **A** HO-1/BMMSCs were adherent cells with long spindle shape. **B** HO-1/BMMSCs could differentiate into osteoblasts *in vitro*, and black calcium deposition was detected by Von Kossa staining. **C** HO-1/BMMSCs could differentiate into adipocytes; red lipid droplets were detected using oil red O staining. **D-F** HO-1/BMSCs were positive for CD29, CD90 and RT1-A and negative for CD34, CD45 and RT1-B using flow cytometry. Biological characteristics of HO-1/ BMSCs were not altered. **G**, **H** Western blotting and PCR confirmed HO-1 overexpression in HO-1/BMMSCs. **I** Overexpression of GFP in HO-1/BMMSCs. \* $P < 0.05$ , \*\* $P < 0.01$ , \*\*\* $P < 0.001$ . BMMSCs, bone marrow mesenchymal stem cells; HO-1, heme oxygenase 1; CD29, integrin subunit beta 1; CD90, Thy-1 cell surface antigen; RT1-A, Rat MHC class I antibody; CD34, cluster of differentiation 34; CD45, protein tyrosine phosphatase receptor type C; RT-1B, Rat MHC class II antibody; GFP, green fluorescent protein.

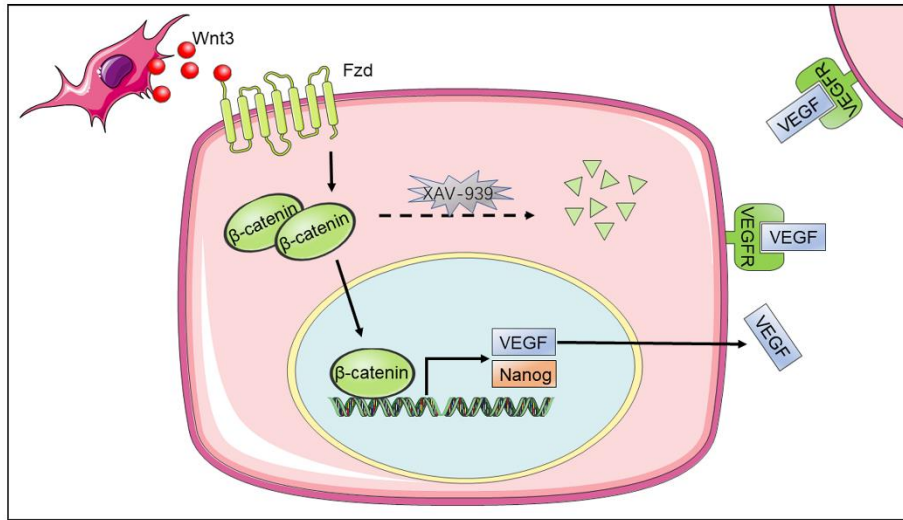

**Supplementary Fig. 3** Schematic diagram of mechanism underlying HO-1/BMMSCs modulating PBG cells to repair injury. HO-1/BMMSCs activated the Wnt signal pathway, and  $\beta$ -catenin accumulated in the cytoplasm and then entered nucleus as a transcription factor to bind to promoter regions of *Vegf* and *Nanog* and upregulated their expression. Nanog maintained pluripotency of biliary progenitor cells, and VEGF has autocrine and paracrine effects on PBGs cells. XAV-939 degraded  $\beta$ -catenin and inhibited the effect of HO-1/BMMSCs. BMMSCs, bone marrow mesenchymal stem cells; HO-1, heme oxygenase 1; PBG, peribiliary gland; VEGF, vascular endothelial growth factor.
